# Supplementary material for: Granular metal–carbon nanocomposites as piezoresistive sensor films – Part 2: Modeling longitudinal and transverse strain sensitivity
Source: Copernicus journal article supplement (doi:10.5194/jsss-7-69-2018), 2018-02-06
Supplement: Supplementary file 1 [file jsss-7-69-2018-supplement.zip]

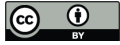

## *Supplement of*

# **Granular metal–carbon nanocomposites as piezoresistive sensor films – Part 2: Modeling longitudinal and transverse strain sensitivity**

**Silvan Schwebke et al.**

*Correspondence to:* Silvan Schwebke ([silvan.schwebke@htwsaar.de](mailto:silvan.schwebke@htwsaar.de))

- [jsss-7-69-2018-supplement-title-page.pdf](#)
- [jsss-2017-90-supplement](#)
  - plot data
    - \* 1 Figure analytical equations R kL.agr
    - \* 2 Figure simulation sigma.agr
    - \* 3 Figure simulation elastic modulus ratio.agr
    - \* 4 Figure simulation diameter constant.agr
    - \* 5 Figure simulation diameter variable.agr
    - \* Readme.txt
  - simulation code
    - \* MCS\_052\_main.py
    - \* MCS\_functions.py
    - \* MCS\_job.py
    - \* MCS\_plot\_eval.py
    - \* MCS\_visualizations.py
    - \* Readme.txt
    - \* bootstrap.py
    - \* pp.py
    - \* ppauto.py
    - \* ppcommon.py
    - \* ppserver.py
    - \* pptransport.py
    - \* ppworker.py
    - \* resistance.py

The copyright of individual parts of the supplement might differ from the CC BY 4.0 License.
